# Supplementary material
Source: Springer Nature journal article supplement (https://www.springermedizin.de/resource/supplementary/12985_2007_297_MOESM1_ESM.pdf/9607734)

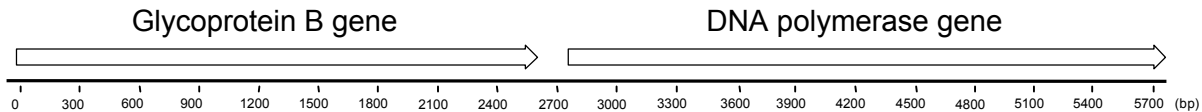

Degenerate PCR primer set,  
specific for a herpesvirus genus

Degenerate PCR primer set,  
specific for  $\alpha + \beta + \gamma$ -*Herpesvirinae*

**A**

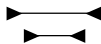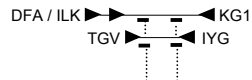

LNA binding sites for:

|           |           |
|-----------|-----------|
| MfasLCV-1 | PtroLCV-1 |
| CgueLCV-1 | GgorLCV-1 |
|           | EBV       |
|           | PhamLCV-2 |
|           | CalHV-3   |
|           | PtroRHV-1 |

Specific PCR primer set  
for long-distance PCR

**B**

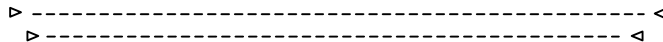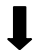

Contiguous sequence

**C**

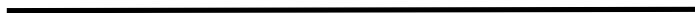

Supplement: MOESM1 [file 9607734]
